# Supplementary material for: Regulation of Synaptic nlg-1/Neuroligin Abundance by the skn-1/Nrf Stress Response Pathway Protects against Oxidative Stress
Source: PubMed Central journal article supplement (PMC3894169; doi:10.1371/journal.pgen.1004100), 2014-01-16
Supplement: pgen.1004100.s009.pdf [file pgen.1004100.s009.pdf]

**Table S2. Punctal analysis of NLG-1-GFP fluorescence.**

|                                                | Peak (arb. units)     | Cord (arb. units)     | Width ( $\mu\text{m}$ ) | IPI ( $\mu\text{m}$ ) |
|------------------------------------------------|-----------------------|-----------------------|-------------------------|-----------------------|
| <b>Figure 5</b>                                |                       |                       |                         |                       |
| <b>Dorsal</b>                                  |                       |                       |                         |                       |
| <i>vjIs105</i> , n=31                          | 42.63 $\pm$ 2.25      | 6.72 $\pm$ 0.91       | 0.72 $\pm$ 0.02         | 3.68 $\pm$ 0.12       |
| <i>vjIs105;lax188</i> , n=29                   | 56.16 $\pm$ 2.51***   | 10.43 $\pm$ 1.44      | 0.84 $\pm$ 0.05*        | 3.47 $\pm$ 0.20       |
| <b>Ventral</b>                                 |                       |                       |                         |                       |
| <i>vjIs105</i> , n=32                          | 467.08 $\pm$ 20.77    | 159.89 $\pm$ 11.49    | 1.34 $\pm$ 0.04         | 3.28 $\pm$ 0.10       |
| <i>vjIs105;lax188</i> , n=26                   | 567.43 $\pm$ 18.14*** | 214.56 $\pm$ 10.53*** | 1.49 $\pm$ 0.05*        | 3.32 $\pm$ 0.08       |
| <b>Figure 6C and 6D</b>                        |                       |                       |                         |                       |
| <i>vjIs105</i> DMSO, n=30                      | 38.13 $\pm$ 1.82      | 3.84 $\pm$ 0.64       | 0.72 $\pm$ 0.16         | 3.53 $\pm$ 0.10       |
| <i>vjIs105</i> 120 $\mu\text{M}$ juglone, n=29 | 50.49 $\pm$ 1.88***   | 5.26 $\pm$ 0.91       | 0.74 $\pm$ 0.02         | 3.36 $\pm$ 0.11       |

\* $p$ <0.05, \*\* $p$ <0.01, \*\*\* $p$ <0.001
