# Supplementary material for: Regulation of Synaptic nlg-1/Neuroligin Abundance by the skn-1/Nrf Stress Response Pathway Protects against Oxidative Stress
Source: PubMed Central journal article supplement (PMC3894169; doi:10.1371/journal.pgen.1004100), 2014-01-16
Supplement: pgen.1004100.s010.pdf [file pgen.1004100.s010.pdf]

**Table S3. Statistical analyses of toxicity assays.**

|                  | <b>N</b> | <b>Comparison</b>         | <b>Chi Sqr</b> | <b>dF</b> | <b>Threshold of significance</b> |
|------------------|----------|---------------------------|----------------|-----------|----------------------------------|
| <b>Figure 7A</b> |          |                           |                |           |                                  |
| N2               | 116      | N2 vs nlg-1*              | 32.38          | 4         | 0.005                            |
| nlg-1            | 68       | N2 vs skn-1*              | 200.50         |           |                                  |
| wdr-23           | 114      | N2 vs skn-1:wdr-23*       | 208.57         |           |                                  |
| skn-1            | 128      | N2 vs wdr-23*             | 149.02         |           |                                  |
| skn-1;wdr-23     | 131      | skn-1 vs skn-1;wdr-23     | 0.01           |           |                                  |
| <b>Figure 7B</b> |          |                           |                |           |                                  |
| N2               | 157      | N2 vs nlg-1               | 3.53           | 6         | 0.002                            |
| wdr-23           | 79       | N2 vs wdr-23*             | 203.33         |           |                                  |
| nlg-1            | 170      | N2 vs lax120*             | 217.61         |           |                                  |
| lax120           | 108      | N2 vs lax188*             | 184.92         |           |                                  |
| lax188           | 92       | lax120 vs lax120;nlg-1*   | 58.31          |           |                                  |
| lax120;nlg-1     | 141      | lax188 vs lax188;nlg-1*   | 61.72          |           |                                  |
| lax188;nlg-1     | 89       |                           |                |           |                                  |
| <b>Figure 7C</b> |          |                           |                |           |                                  |
| N2               | 96       | N2 vs nlg-1*              | 85.54          | 5         | 0.003                            |
| nlg-1            | 75       | N2 vs vjIs105*            | 217.54         |           |                                  |
| vjIs105;nlg-1    | 137      | N2 vs vjIs105;nlg-1*      | 90.45          |           |                                  |
| vjIs105;nlg-1    | 81       | N2 vs vjEx561*            | 62.68          |           |                                  |
| vjEx561          | 104      | N2 vs vjEx561;nlg-1       | 0.00           |           |                                  |
| vjEx561;nlg-1    | 68       | nlg-1 vs vjIs105*         | 259.03         |           |                                  |
|                  |          | nlg-1 vs vjIs105;nlg-1*   | 141.00         |           |                                  |
|                  |          | nlg-1 vs vjEx561*         | 172.67         |           |                                  |
|                  |          | nlg-1 vs vjEx561;nlg-1*   | 46.15          |           |                                  |
|                  |          | vjIs105 vs vjIs105;nlg-1* | 16.67          |           |                                  |
|                  |          | vjEx561 vs vjEx561;nlg-1* | 38.99          |           |                                  |
| <b>Figure S4</b> |          |                           |                |           |                                  |
| N2               | 62       | N2 vs nlg-1               | 3.12           | 4         | 0.005                            |
| nlg-1            | 64       | N2 vs wdr-23              | 2.32           |           |                                  |
| wdr-23           | 71       | N2 vs skn-1*              | 117.91         |           |                                  |
| skn-1            | 53       | N2 vs wdr-23;skn-1*       | 99.72          |           |                                  |
| wdr-23;skn-1     | 76       | skn-1 vs wdr-23;skn-1     | 0.06           |           |                                  |

**Table S3. Cont.**

|                  | <b>N</b> | <b>Comparison</b>      | <b>Chi Sqr</b> | <b>dF</b> | <b>Threshold of significance</b> |
|------------------|----------|------------------------|----------------|-----------|----------------------------------|
| <b>Figure S5</b> |          |                        |                |           |                                  |
| N2               | 161      | N2 vs nlg-1*           | 99.16          | 5         | 0.003                            |
| nlg-1            | 108      | N2 vs wdr-23*          | 358.51         |           |                                  |
| wdr-23           | 156      | N2 vs skn-1*           | 213.20         |           |                                  |
| skn-1            | 120      | N2 vs wdr-23;skn-1*    | 213.20         |           |                                  |
| wdr-23;nlg-1     | 113      | N2 vs wdr-23;nlg-1*    | 271.61         |           |                                  |
| wdr-23;skn-1     | 120      | skn-1 vs wdr-23;skn-1  | 0.33           |           |                                  |
|                  |          | wdr-23 vs wdr-23;nlg-1 | 1.39           |           |                                  |
| <b>Figure S6</b> |          |                        |                |           |                                  |
| N2               | 133      | N2 vs nlg-1*           | 37.92          | 5         | 0.003                            |
| nlg-1            | 82       | N2 vs lax120*          | 170.66         |           |                                  |
| lax120           | 113      | N2 vs lax188*          | 180.68         |           |                                  |
| lax120;nlg-1     | 73       | lax120 vs lax120;nlg-1 | 0.10           |           |                                  |
| lax188           | 125      | lax188 vs lax188;nlg-1 | 0.00           |           |                                  |
| lax188;nlg-1     | 64       |                        |                |           |                                  |
| <b>Figure S7</b> |          |                        |                |           |                                  |
| N2               | 95       | N2 vs nlg-1*           | 42.01          | 3         | 0.008                            |
| nlg-1            | 89       | N2 vs vjIs47*          | 29.14          |           |                                  |
| vjIs47           | 112      | N2 vs vjIs105*         | 228.82         |           |                                  |
| vjIs105          | 132      | vjIs47 vs vjIs105*     | 145.50         |           |                                  |

\**p* value statistically less than the Bonferroni-corrected threshold of significance.
